# Supplementary material
Source: PubMed Central journal article supplement (PMC3855323)
Supplement: NIHMS530153-supplement-01.pdf [file NIHMS530153-supplement-01.pdf]

## Supplemental Data

### Site-specific differences in proteasome-dependent degradation of monoubiquitinated $\alpha$ -synuclein

Tharindumala Abeywardana,<sup>1</sup> Yu Hsuan Lin,<sup>1</sup> Ruth Rott,<sup>2</sup> Simone Engelender,<sup>2,4</sup> and Matthew R. Pratt<sup>1,3,4</sup>

<sup>1</sup>Department of Chemistry, <sup>3</sup>Department of Molecular and Computational Biology  
University of Southern California, Los Angeles, CA 90089

<sup>2</sup>Department of Pharmacology, The B. Rappaport Institute of Medical Research, Technion-Israel  
Institute of Technology, Haifa 31096, Israel

<sup>4</sup>Correspondence should be addressed to [matthew.pratt@usc.edu](mailto:matthew.pratt@usc.edu) or [simone@tx.technion.ac.il](mailto:simone@tx.technion.ac.il)

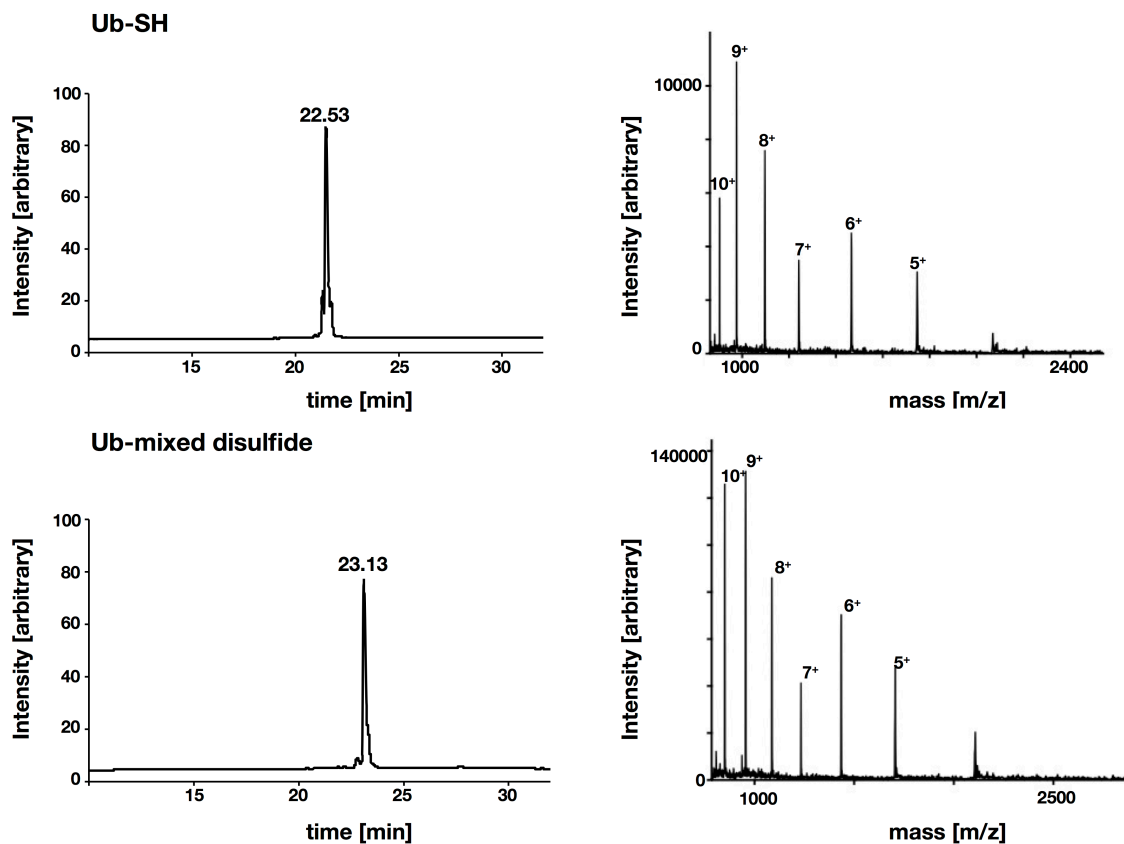

**Figure S1. Characterization ubiquitin C-terminal thiol and mixed disulfide, related to Figure 1A.**

Ubiquitin C-terminal thiol and the corresponding mixed disulfide were purified by RP-HPLC and characterized by mass spectrometry.

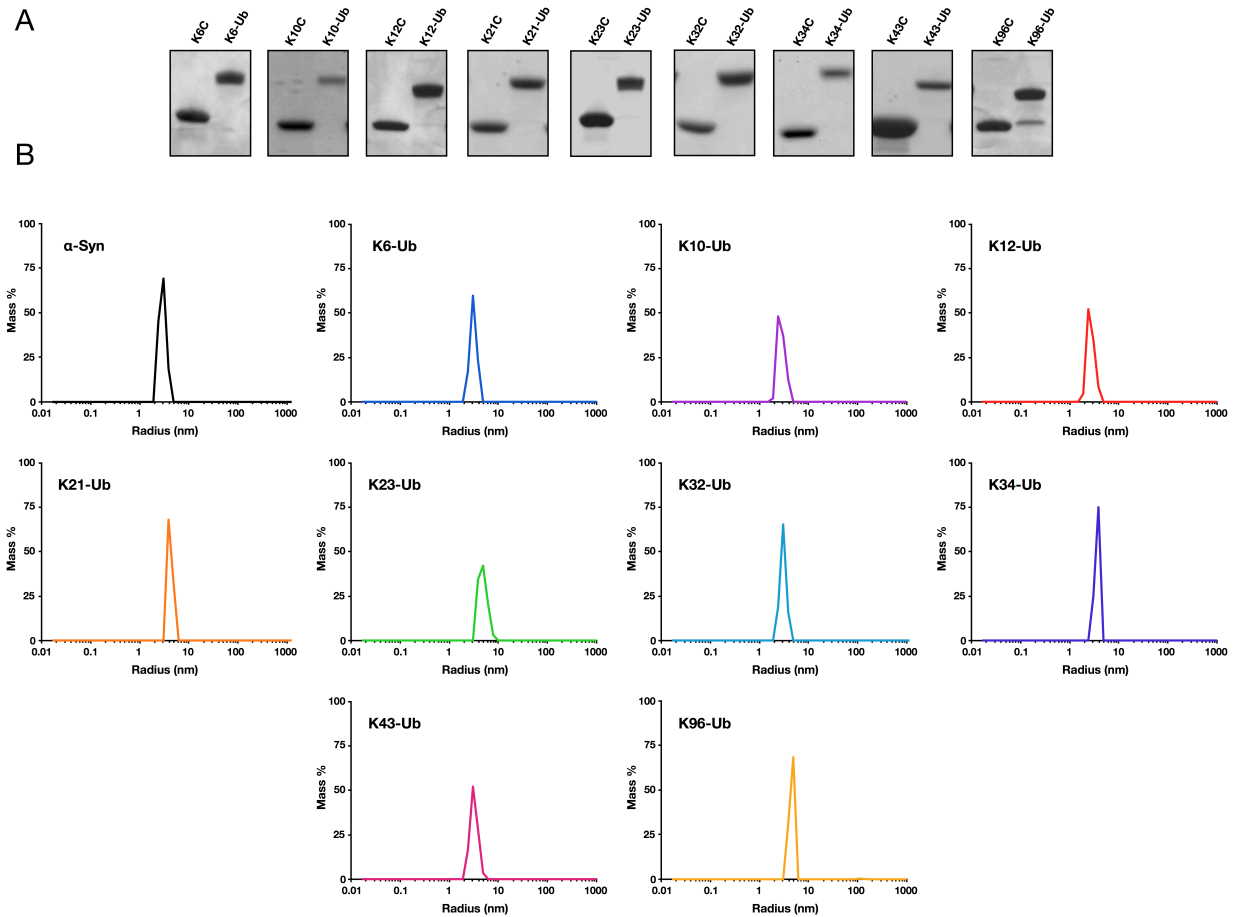

**Figure S2. Characterization of unmodified and monoubiquitinated  $\alpha$ -synuclein proteins, related to Figure 1.**

A) Unmodified  $\alpha$ -synuclein and all nine monoubiquitinated analogs were separated by SDS-PAGE and visualized by coomassie blue staining. B) Unmodified  $\alpha$ -synuclein and all nine monoubiquitinated analogs were analyzed by light scattering and plotted as mass percentage against Stokes radius.

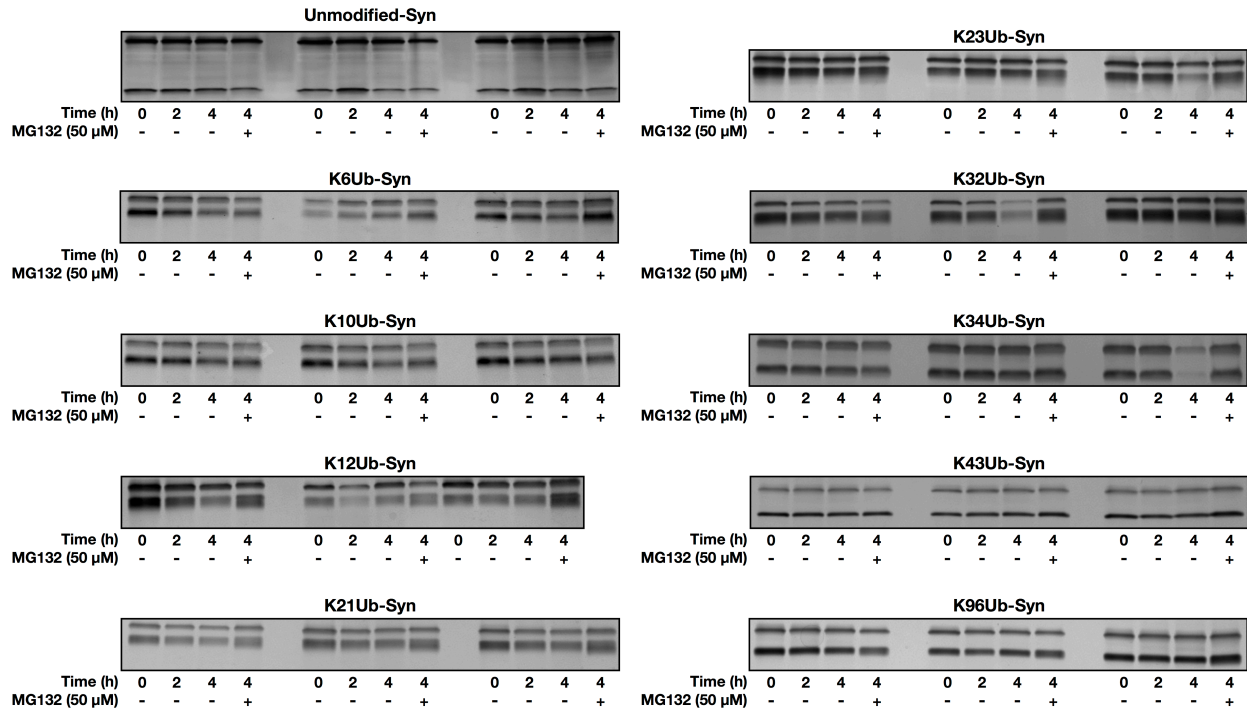

**Figure S3. Proteasome-dependent degradation of monoubiquitinated  $\alpha$ -synuclein, related to Figure 3.**

Unmodified or monoubiquitinated  $\alpha$ -synuclein proteins were incubated in triplicate with 26S proteasome for the indicated lengths of time. The proteasome inhibitor MG132 (100  $\mu$ M) was added as indicated. The proteins were separated by SDS-PAGE and stained with colloidal silver.
